# Supplementary material for: Loss of calcium/calmodulin-dependent protein kinase kinase 2, transferrin, and transferrin receptor proteins in the temporal cortex of Alzheimer’s patients postmortem is associated with abnormal iron homeostasis: implications for patient survival
Source: Front Cell Dev Biol. 2024 Nov 28;12:1469751. doi: 10.3389/fcell.2024.1469751 (PMC11634808; doi:10.3389/fcell.2024.1469751)
Supplement: Supplementary file 4 [file Table1.xlsx]

## Sheet: Sheet1
Serial number	NeuroBiobank Identifcation number	Brain repository name	Age and manner of death	Brain area	Subject Sex	Race	PMI (hours)	RIN
1	4646	Maryland	Gestational 19 weeks 5 days, still berth	BA10	Female	Black or African-American	1	Unknown
2	4646	Maryland	Gestational 19 weeks 5 days, still berth	TEMPORAL LOBE	Female	Black or African-American	1	Unknown
3	1659	Maryland	0, undetermined	BA10	Female	White	19	Unknown
4	4711	Maryland	Gestational 18 weeks 4 days, still berth	BA10	Male	Black or African-American	1	Unknown
5	4711	Maryland	0, undetermined	TEMPORAL LOBE	Male	Black or African-American	1	Unknown
6	4644	Maryland	36 weeks, undetermined	BA10	Female	White	11	Unknown
7	4441	Maryland	3 years, natural	BA10	Female	White	15	4.1
8	4670	Maryland	4 years, accidental	BA10	Male	White	17	7.7
9	5925	Maryland	7 years, natural	BA10	Female	Black or African-American	30	6.4
10	M3415	Maryland	7 years,, undetermined	BA11	Male	Black or African-American	12	Unknown
11	1708	Maryland	8 years, natural	BA12	Female	Black or African-American	20	Unknown
12	5391	Maryland	8 years, accidental	BA13	Female	Black or African-American	12	100
13	4337	Maryland	8 years, accidental	BA14	Male	Black or African-American	16	8.4
14	6175	Maryland	10 years, suicide	BA10	Male	Black or African-American	15	7.3
15	4787	Maryland	12 years, undermined	BA10	Male	Black or African-American	15	6.9
16	6278	Maryland	12 years, undermined	BA10	Male	Black or African-American	37	6.8
17	HCTZZQ	Miami	13 years, undermined	BA10	Female	Black or African-American	18.2	9.2
18	5376	Maryland	13 years, suicide	BA10	Male	White	19	7.2
19	5309	Maryland	14 years, natural	BA10	Female	White	8	6.9
20	5830	Maryland	75 years, natural	BA10	Male	White	18	6.9
21	6054	Maryland	76 years, natural	BA10	Male	White	15	5.9
22	6072	Maryland	82 years, natural	BA10	Female	White	21	6.9
23	6752	Maryland	13 years, electrocution	BA10	Male	White	33	7.1
24	6580	Maryland	13 years, suicide, hanging	BA10	Male	No report	12	4.6
25	5445	Maryland	42 years, natural	BA11	Female	Black or African-American	10	2.5
26	4789	Maryland	72 years, Accidental	BA12	Female	White	19	Unknown
27	4921	Maryland	73 years, natural	BA13	Female	White	13	Unknown
28	4735	Maryland	73 years, natural	BA14	Male	White	21	Unknown
29	1678	Maryland	79 years, Alzheimer's	BA15	Female	White	8	Unknown
30	A21-006	Miami	90 years, natural	Temporal coretx	Male	Unknown	56	Unknown
